# Supplementary material
Source: HighWire-hosted journal article supplement (https://jitc.bmj.com/content/8/2/e001391)
Supplement: inline-supplementary-material-4 [file inline-supplementary-material-4.pdf]

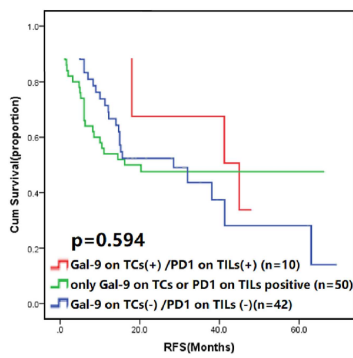

A) Gal-9 on TCs and PD1 on TILs

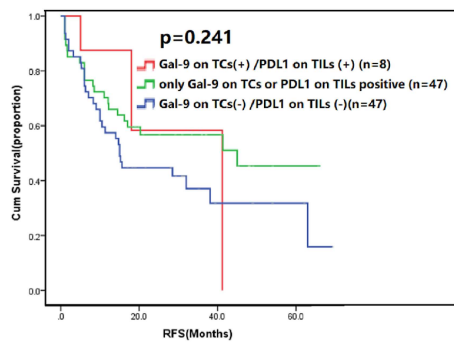

B) Gal-9 on TCs and PDL1 on TILs

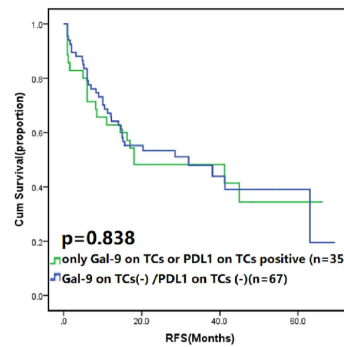

C) Gal-9 on TCs and PDL1 on tumor cells

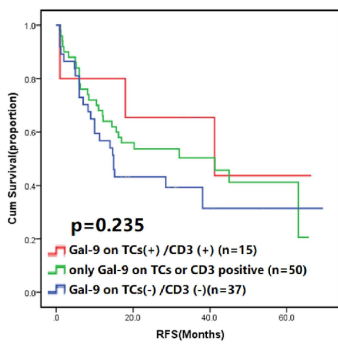

D) Gal-9 on TCs and CD3

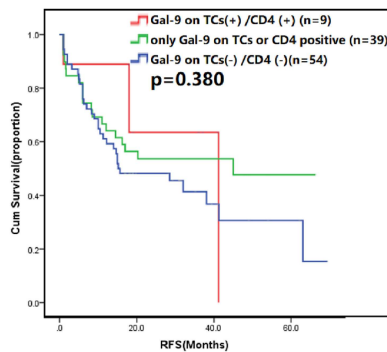

E) Gal-9 on TCs and CD4

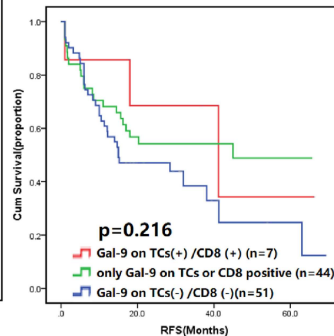

F) Gal-9 on TCs and CD8

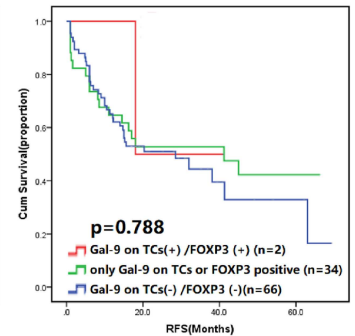

G) Gal-9 on TCs and FOXP3
