# Supplementary material
Source: HighWire-hosted journal article supplement (https://jitc.bmj.com/content/8/2/e001391)
Supplement: inline-supplementary-material-8 [file inline-supplementary-material-8.pdf]

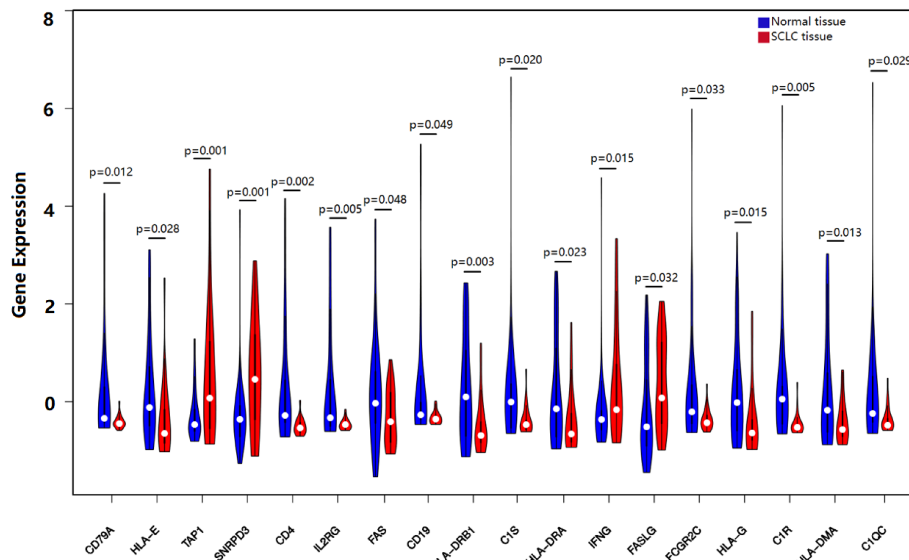

A) Validation of Gal-9-associated genes expression in SCLC

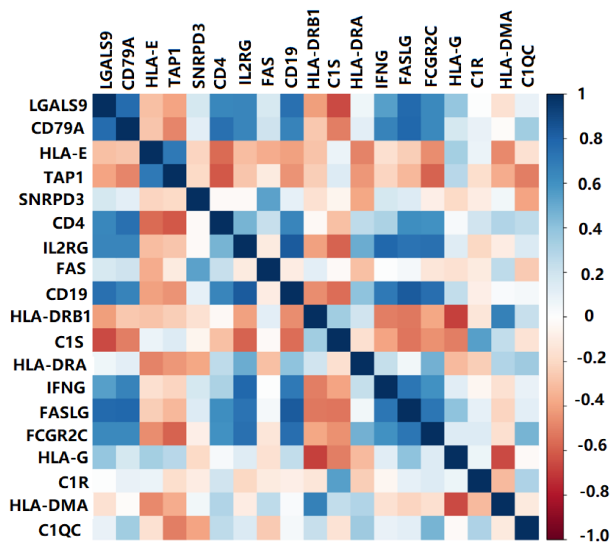

B) Relation between Lgals9 and 18 differentially expressed genes

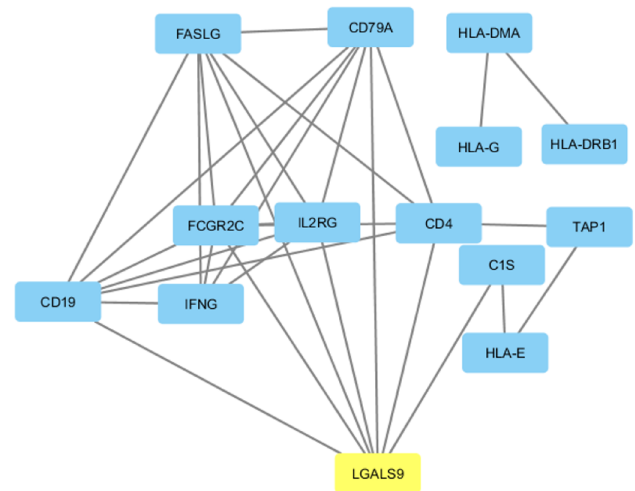

C) The Lgals9-associated network by Cytoscape
