# Supplementary material
Source: HighWire-hosted journal article supplement (https://jitc.bmj.com/content/8/2/e001391)
Supplement: inline-supplementary-material-9 [file inline-supplementary-material-9.pdf]

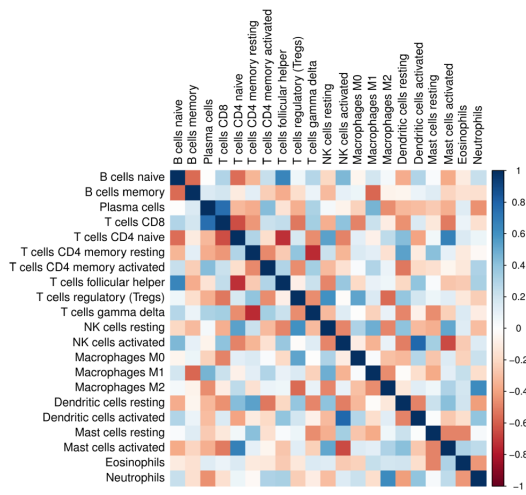

A) Relationship between immune cell proportions in high risk

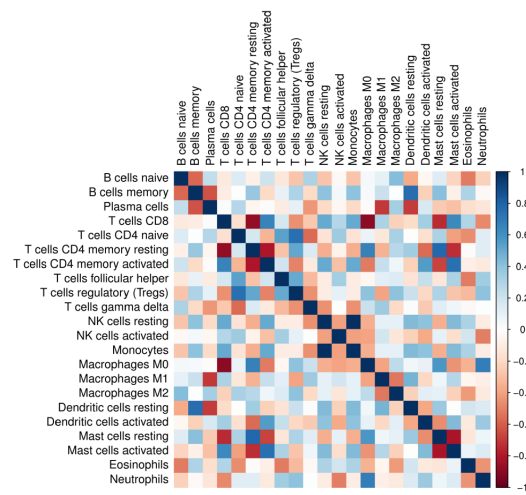

B) Relationship between immune cell proportions in low risk

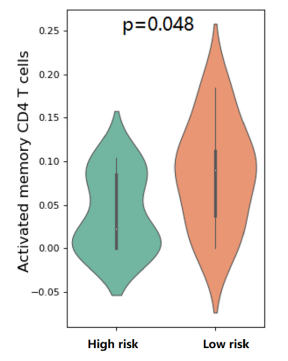

C) Activated memory CD4 T cells
